# Supplementary material
Source: PubMed Central journal article supplement (PMC3943099)

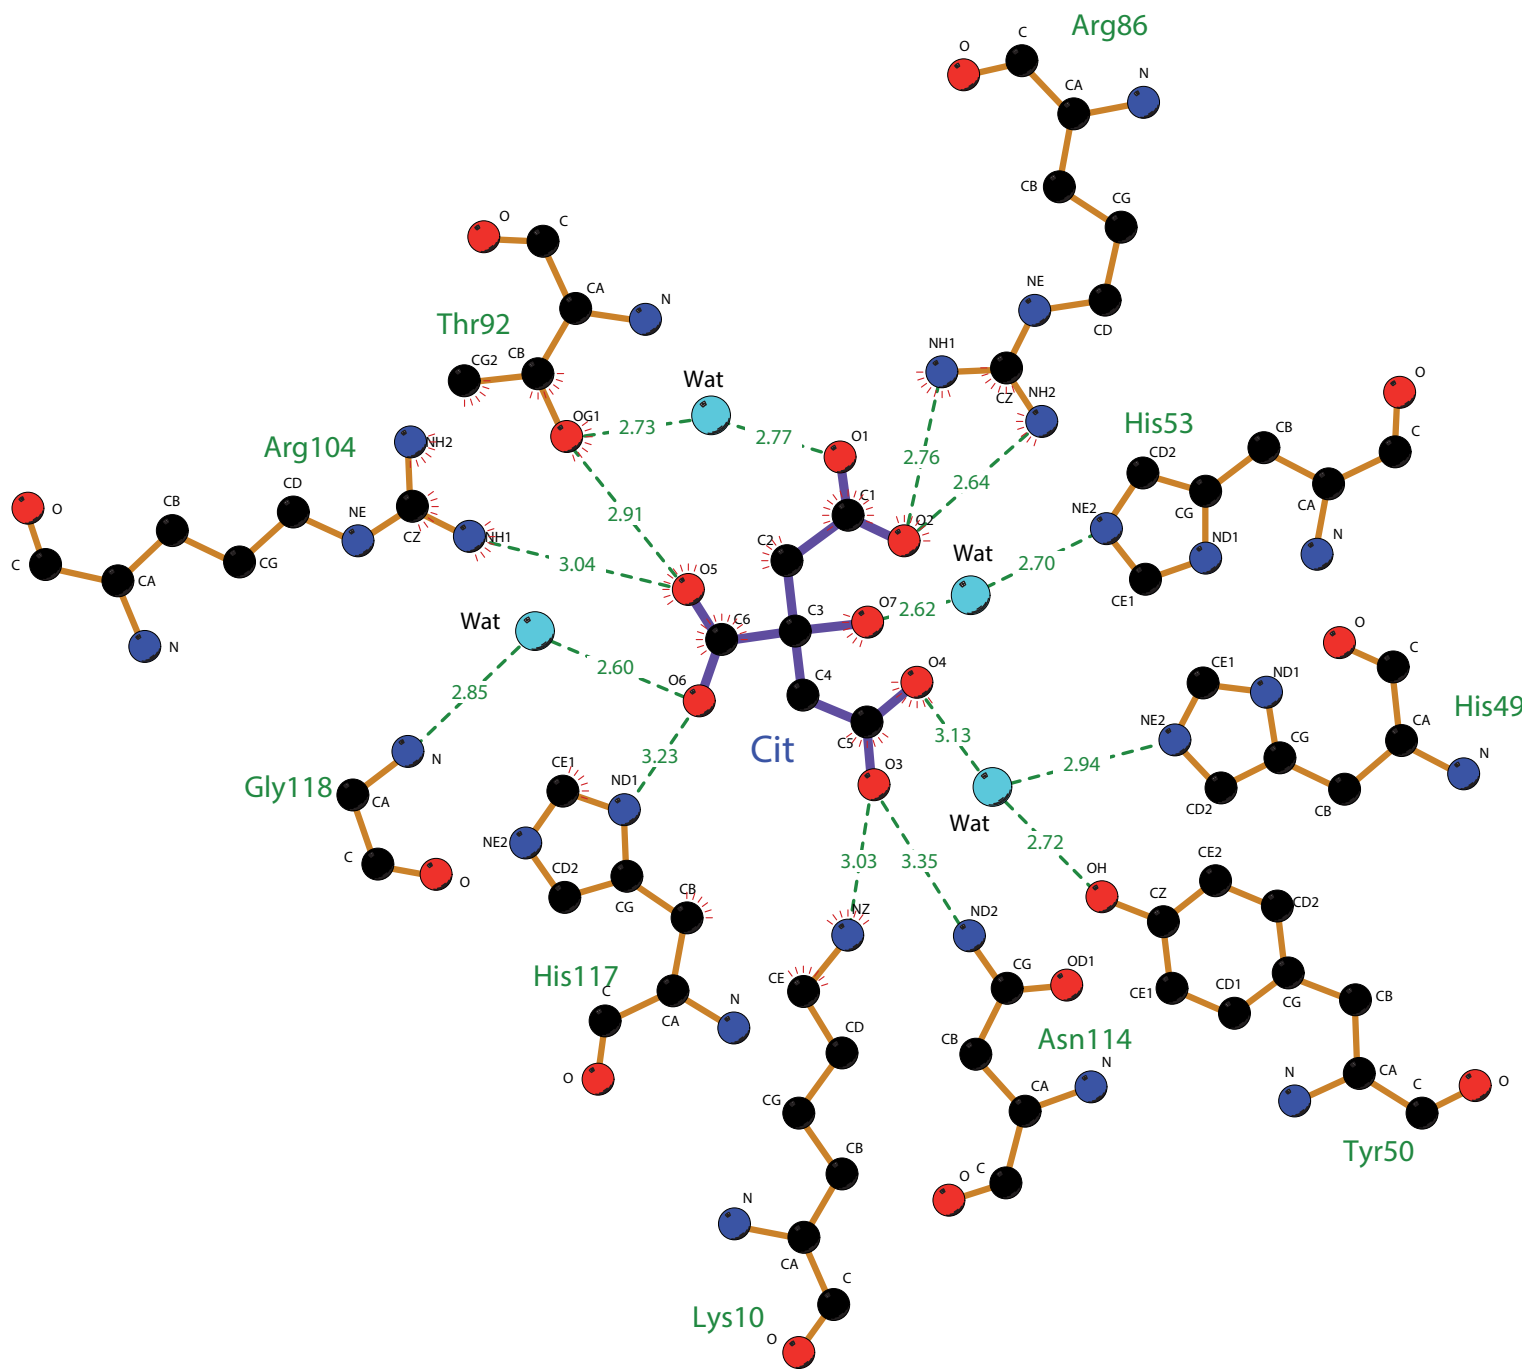

Supplement: f-70-00040-sup3.pdf [file f-70-00040-sup3.pdf]
